# Supplementary material for: Title: E-cigarettes and smoking in Irish teens: A logistic regression analysis of current (past 30-day) use of e-cigarettes
Source: Research Square preprint supplement (doi:10.21203/rs.3.rs-348621/v1), 2021-06-25
Supplement: Supplementary file 1 [file af644ab7c7d62f4a1a78c66e.docx]

Supplemental File 2 Table IA: Study variables (expanded)

| Sn | Variable | Question and Response Categories |
| --- | --- | --- |
| 1 | Age | What year were you born?  Response Categories: Year, Month |
| 2 | Gender | What is your sex?  Response Categories: Male, Female |
| 3 | Father’s Education | What is the highest level of schooling your father completed?  Response Categories: Completed primary school or less, some secondary school, completed secondary school, some college or university, Completed or university, don’t know, does not apply |
| 4 | Mother’s Education | What is the highest level of schooling your mother completed?  Response Categories: Completed primary school or less, some secondary school, completed secondary school, Some college or university, Completed or university, Don’t know,Does not apply |
| 5 | Perceived wealth | How well off is your family compared to other families in your country?  Response Categories: Very much better off, Much better off, About the same, Less well off, Much less well off, Very much less well off |
|  | Household composition | Which of the following people live in the same house in which you stay most of the time? Mark all that apply. Response Categories: I live alone, Father, Stepfather, Mother, Stepmother, Brother(s), Sister(s), Grandparent(s), Other relative(s), Non-relative(s) (e.g., when living in a boarding school or equivalent) |
|  | Average grade | Which of the following best describes your average grade at the end of the last term? (Tick only one) Response Categories: 70 to 100% mostly A’s and B’s, 51 to 69% mostly C’s, 40 to 50% mostly D’s, 39% or lower mostly E’s or lower |
| 6 | Read books  Actively participate in sports | How often do you participate in each of the following:  Read books, actively participate in sports, athletics or exercising, Other hobbies  Response Categories: Never, A few times a year, Once or twice a month, At least once a week, Almost every day |
| 7 | Age of alcohol initiation | When, if ever, did you FIRST do each of the following things: Drink alcohol (at least one glass)  Response Categories: Never, 9 years old or less, 10 years, 11 years, 12 years, 13 years, 14 years, 15 years, 16 years or older |
| 8 | Age of smoking initiation | When, if ever, did you FIRST: Smoke your first cigarettes (excluding e-cigarettes)  Response Categories: Never, 9 years old or less, 10 years, 11 years, 12 years, 13 years, 14 years, 15 years, 16 years or older |
| 9 | Drank to get high | On how many occasions (if any) have you been intoxicated from drinking alcoholic beverages, for example staggered when walking, not being able to speak properly, throwing up or not remembering what happened? Number of occasions in your lifetime: Response Categories: 0, 1-2, 3-5, 6-9, 10-19, 20-39, 40 or more |
| 10 | Problems with social media use | How much do you agree or disagree with the following statements on Social Media communicating with others on the Internet? [for example, WhatsApp, Twitter, Facebook, Skype, Blogs, Snapchat, Instagram, Kik etc] (a) I think I spend way too much time on Social Media. (b) I get in a bad mood when I cannot spend time on Social Media (c) My parents say that I spend way too much time on Social Media Response Categories: Strongly agree, partly agree, neither nor, partly disagree, strongly disagree |
| 11 | Problems with internet use | Please indicate how often these statements apply to you. 14 circumstances described  Response Categories: Never, Seldom, Sometimes, Often, Very often |
| 12 | Problems with online gaming | Please read the statements below regarding online gaming. The question REFERS TO ONLINE GAMES exclusively, but we use the expression ‘game’ in each statement for simplicity’s sake. Please indicate how often each statement apply to you 12 circumstances described  Response Categories: Never, Seldom, Sometimes, Often, Very often |
| 13 | Problems with gambling | Have you ever felt the need to bet more and more money?  Response Categories: No, Yes  Have you ever had to lie to people important to you about how much you gambled?  Response Categories: No, Yes |
| 14 | Skipping school | During the LAST 30 DAYS on how many days have you missed one or more lessons because you skipped Response Categories: None, 1 day, 2 days, 3-4 days, 5-6 days, 7 or more days |
| 15 | Absent due to illness | During the LAST 30 DAYS on how many days have you missed one or more lessons because of illness  Response Categories: None, 1 day, 2 days, 3-4 days, 5-6 days, 7 or more days |
| 16 | Perceived risk of trying e-cigarettes once or twice | How much do you think people risk harming themselves (physically or in other ways) if they try e-cigarettes once or twice?  Response Categories: No risk, Slight risk, Moderate risk, Great risk, don’t know |
| 17 | Ever smoked cigarettes | On how many occasions (if any) during your lifetime have you smoked cigarettes (excluding e-cigarettes)?  Response Categories: 1-2, 3-5, 6-9, 10-19, 20-39, 40 or more |
| 18 | Current smoking status | How often have you smoked cigarettes (excluding e-cigarettes) during the LAST 30 DAYS?  Response Categories: Not at all, Less than 1 cigarette per week, Less than 1 cigarette per day, 6-10 cigarettes per day, 11-20 cigarettes per day, More than 20 cigarettes per day |
| 19 | Ever alcohol use | On how many occasions (if any) have you had any alcoholic beverage to drink in your lifetime?  Response Categories: 0, 1-2, 3-5, 6-9, 10-19, 20-39, 40 or more |
| 20 | Current alcohol use | On how many occasions (if any) have you had any alcoholic beverage to drink during the last 30 days?  Response Categories: 0, 1-2, 3-5, 6-9, 10-19, 20-39, 40 or more |
| 21 | Current binge drinking | Think back over the LAST 30 DAYS. How many times (if any) have you had five or more drinks on one occasion? (A drink is defined as 1 glass/bottle /can of beer (33 cl), 1 glass of wine (ca 15 cl), 1 glass of spirits (ca 4 cl), 1 glass/bottle of cider (33 cl), 1 glass/bottle of premixed drinks (spritz, alcopops, etc. 33 cl)) Response Categories: None, 1, 2, 3-5, 6-9, 10 or more times |
| 22 | Ever cannabis use | On how many occasions (if any) have you used cannabis in your lifetime?  Response Categories: 0, 1-2, 3-5, 6-9, 10-19, 20-39, 40 or more |
| 23 | Current cannabis use | On how many occasions (if any) have you used cannabis during the last 30 days?  Response Categories: 0, 1-2, 3-5, 6-9, 10-19, 20-39, 40 or more |
| 24 | Cannabis problem use | Have you used cannabis in the LAST 12 MONTHS? If yes, has the following happened to you during the last 12 months? a) Have you smoked cannabis before midday? (b) Have you smoked cannabis when you were alone? (c) Have you had memory problems when you smoked cannabis?  (d) Have friends or members of your family told you that you ought to reduce or stop your cannabis use? (e) Have you tried to reduce or stop your cannabis use with- out succeeding? (f) Have you had problems because of your use of cannabis (argument, fight, accident, bad result at school, etc)?  Response Categories: Never, Rarely, From time to time, Fairly often, Very often |
| 27 | Peer risk activities | How many of your friends would you estimate:  (a) smoke cigarettes? (b) drink alcoholic beverages (beer, cider, premixed drinks, wine, spirits)?  (c) get drunk? (d) smoke cannabis? (e) take tranquillisers or sedatives (without a doctor’s prescription)? (f) take ecstasy? (g) use inhalants? (recoded yes, no) Response Categories: None, A few, Some, Most, All |
| 28 | Familial support | We are interested in how you feel about the following statements  a) My family really tries to help me  b) I get the emotional help and support I need from my family  c) I can talk about my problems with my family  d) My family is willing to help me make decisions  Response Categories: Very strongly disagree, 2, 3, 4, 5, 6, Very strongly agree |
| 29 | Peer Support | We are interested in how you feel about the following statements  a) My friends really try to help me  b) I can count on my friends when things go wrong  c) I have friends with whom I can share my joys and sorrows  d) I can talk about my problems with my friends  Response Categories: Very strongly disagree, 2, 3, 4, 5, 6, Very strongly agree |
| 30 | Familial regulation | Does your mother or your father know where you spend Saturday nights?  Response Categories: Know always, know quite often, know sometimes, usually don’t know |
